Correction

# Correction: Soil Calcium Availability Influences Shell Ecophenotype Formation in the Sub-Antarctic Land Snail, *Notodiscus hookeri*

The PLOS ONE Staff

Notice of Republication.

This article was republished on February 21, 2014 due to missing figures in the PDF. Please download this article again to view the figures.

## Reference

1. Charrier M, Marie A, Guillaume D, Bédouet L, Le Lannic J, et al. (2013) Soil Calcium Availability Influences Shell Ecophenotype Formation in the Sub-Antarctic Land Snail, *Notodiscus hookeri*. PLoS ONE 8(12): e84527. doi:10.1371/journal.pone.0084527

**Citation:** The PLOS ONE Staff (2014) Correction: Soil Calcium Availability Influences Shell Ecophenotype Formation in the Sub-Antarctic Land Snail, *Notodiscus hookeri*. PLoS ONE 9(3): e92541. doi:10.1371/journal.pone.0092541

**Published:** March 10, 2014

**Copyright:** © 2014 The PLOS ONE Staff. This is an open-access article distributed under the terms of the Creative Commons Attribution License, which permits unrestricted use, distribution, and reproduction in any medium, provided the original author and source are credited.
